# CCR5 Haplotypes Influence HCV Serostatus in Caucasian Intravenous Drug Users

Kristi Huik<sup>1</sup>, Radko Avi<sup>1</sup>, Andrew Carrillo<sup>2,3</sup>, Nathan Harper<sup>2,3</sup>, Merit Pauskar<sup>1</sup>, Maarja Sadam<sup>1</sup>, Tõnis Karki<sup>1</sup>, Tõnu Krispin<sup>1</sup>, Ulvi-Kaire Kongo<sup>4</sup>, Tatiana Jermilova<sup>5</sup>, Kristi Rüütel<sup>6</sup>, Ave Talu<sup>6</sup>, Katri Abel-Ollo<sup>6</sup>, Anneli Uusküla<sup>7</sup>, Sunil K. Ahuja<sup>2,3</sup>, Weijing He<sup>2,3\*</sup>, Irja Lutsar<sup>1\*</sup>

**1** Department of Microbiology, Faculty of Medicine, University of Tartu, Tartu, Estonia, **2** Veterans Administration Research Center for AIDS and HIV-1 Infection, and Center for Personalized Medicine, South Texas Veterans Health Care System, San Antonio, Texas, United States of America, **3** Departments of Medicine, University of Texas Health Science Center, San Antonio, Texas, United States of America, **4** Immunohaematology Reference Laboratory, North Estonia Medical Centre Foundation, Tallinn, Estonia, **5** Blood Center of Kohtla-Järve, Kohtla-Järve, Estonia, **6** National Institute for Health Development, Tallinn, Estonia, **7** Department of Public Health, Faculty of Medicine, University of Tartu, Tartu, Estonia

## Abstract

**Background:** Up to 90% HIV-1 positive intravenous drug users (IDUs) are co-infected with HCV. Although best recognized for its function as a major co-receptor for cell entry of HIV, CC chemokine receptor 5 (CCR5) has also been implicated in the pathogenesis of HCV infection. Here, we investigated whether CCR5 haplotypes influence HIV-1 and HCV seropositivity among 373 Caucasian IDUs from Estonia.

**Methods:** Of these IDUs, 56% and 44% were HIV and HCV seropositive, respectively, and 47% were coinfecting. 500 blood donors seronegative for HIV and HCV were also evaluated. CCR5 haplotypes (HHA to HHG\*2) were derived after genotyping nine CCR2–CCR5 polymorphisms. The association between CCR5 haplotypes with HIV and/or HCV seropositivity was determined using logistic regression analysis. Co-variables included in the models were length of intravenous drug use, HBV serostatus and copy number of CCL3L1, the gene encoding the most potent HIV-suppressive chemokine and ligand for CCR5.

**Results:** Compared to IDUs seronegative for both HCV and HIV (HCV–/HIV–), IDUs who were HCV+/HIV– and HCV+/HIV+ were 92% and 82%, respectively, less likely to possess the CCR5-HHG\*1 haplotype, after controlling for co-variables ( $P_{\text{adjusted}} = 1.89 \times 10^{-4}$  and 0.003, respectively). This association was mostly due to subjects bearing the CCR5 HHE and HHG\*1 haplotype pairs. Approximately 25% and <10% of HCV–/HIV– IDUs and HCV–/HIV– blood donors, respectively, possessed the HHE/HHG\*1 genotype.

**Conclusions:** Our findings suggest that HHG\*1-bearing CCR5 genotypes influence HCV seropositivity in a group of Caucasian IDUs.

**Citation:** Huik K, Avi R, Carrillo A, Harper N, Pauskar M, et al. (2013) CCR5 Haplotypes Influence HCV Serostatus in Caucasian Intravenous Drug Users. PLoS ONE 8(7): e70561. doi:10.1371/journal.pone.0070561

**Editor:** Sarah Pett, University of New South Wales, Australia

**Received:** November 27, 2012; **Accepted:** June 23, 2013; **Published:** July 25, 2013

**Copyright:** © 2013 Huik et al. This is an open-access article distributed under the terms of the Creative Commons Attribution License, which permits unrestricted use, distribution, and reproduction in any medium, provided the original author and source are credited.

**Funding:** The work at San Antonio was supported by the Veterans Affairs (VA) Center for AIDS and HIV Infection and VA Center for Personalized Medicine of the South Texas Veterans Health Care System, a National Institutes of Health (NIH) MERIT grant (R37AI046326), and the Doris Duke Distinguished Clinical Scientist Award to S.K.A. S.K.A. is also supported by a VA MERIT award, the Elizabeth Glaser Pediatric AIDS Foundation, the Burroughs Wellcome Clinical Scientist Award in Translational Research and the Senior Scholar Award from the Max and Minnie Tomerlin Voelcker Fund. The work at Estonia was supported by European Union through the European Regional Development Fund; Estonian Science Foundation (grants 8004, 8415 and 8856); Basic Financing and the Target Financing of Estonian Ministry of Education and Research (SF0180004s12); European Commission funded project Expanding Network for Comprehensive and Coordinated Action on HIV/AIDS prevention among IDUs and Bridging Population Nr. 2005305 (ENCAP); Global Fund to Fight HIV, Tuberculosis and Malaria Program “Scaling up the response to HIV in Estonia” for 2003–2007; National HIV/AIDS Strategy for 2006–2015; US Civilian Research Development Foundation (grant ESX0-2722-TA-06); US National Institutes of Health, National Institute on Drug Abuse (grant R01DA03574); the Archimedes Foundation and Norwegian Financial Mechanism/EEA(grant EE0016). The funders had no role in study design, data collection and analysis, decision to publish, or preparation of the manuscript.

**Competing Interests:** Dr. Ahuja and Dr. He are academic editors of PLOS ONE. This does not alter the authors’ adherence to all the PLOS ONE policies on sharing data and materials. Other co-authors declare no conflict of interest.

\* E-mail: hew@uthscsa.edu (WH); Irja.Lutsar@ut.ee (IL)

## Introduction

Infection with human immunodeficiency virus 1 (HIV-1) and hepatitis C virus (HCV) remains a source of high morbidity and mortality worldwide [1–4]. Among subjects at risk for acquiring HIV or HCV infection [e.g. intravenous drug users (IDU)], co-infection rates can be as high as 90% [2]. Although IDU’s provide an excellent model system to assess genetic risk factors that

associate with variable susceptibility to HCV and HIV, the high rates of co-infection make it difficult to distinguish between genetic factors that associate specifically with risk of HIV vs. HCV infection, or both. Consequently, the commonality in the risk factors for acquiring HIV and HCV infection and HIV-HCV co-infection may, depending upon the cohort or population studied, complicate interpretation of genetic association studies [5]. For

example, a previous study found that homozygosity for the 32-bp ( $\Delta 32$ ) deletion mutation in the coding region of CC chemokine receptor 5 (CCR5), the major co-receptor for cell entry of HIV, was overrepresented in a group of HCV-positive IDUs [6]. It was inferred that the *CCR5- $\Delta 32/\Delta 32$*  mutation is a susceptibility factor for HCV infection. However, because *CCR5- $\Delta 32/\Delta 32$*  mutation associates with strong protection against HIV infection, an alternative explanation could be that HCV-positive survivors in populations under selective pressure of HIV infection (e.g. hemophiliacs), the overrepresentation of *CCR5- $\Delta 32/\Delta 32$*  genotype could represent those who resisted HIV infection [5].

To identify genetic factors that associate with risk of acquiring HCV or HIV, or both concurrently, we recently analyzed a well-characterized group of high-risk IDUs from Estonia, a geographic region that has witnessed an abrupt rise of HIV infection among IDUs since the year 2000 [7]. We found that a high copy number of *CCL3L1*, the gene encoding the most potent HIV suppressive ligand of CCR5, associated with a reduced risk of HIV seropositivity after controlling for HCV and HBV co-infection status as well as length of intravenous drug use (IVDU). An association between *CCL3L1* copy number and HCV or HBV status was not detected. Because extensive data has demonstrated that variations in the non-coding regions (e.g. promoters) of *CCR5* also associate with variable HIV-AIDS susceptibility [8–14] and since CCR5 may influence pathogenesis of HCV infection [6,15–24], here, we determined the associations between polymorphisms in *CCR5* and HCV and/or HIV serostatus in this IDU study population from Estonia.

## Materials and Methods

### Subjects and Sample Collection

The IDU population studied was described previously [7]. Briefly, we recruited 373 Caucasian IDUs in 2006 and 2007 from syringe-exchange programs ( $n = 270$ ) using a respondent-driven sampling [25,26] and from three Estonian prisons ( $n = 103$ ). There were 300 males, 55 females and 18 with gender unknown. The median age in the overall IDUs was 26 years (interquartile range, IQR: 22–29 years). All study subjects were Caucasians from Estonia. Altogether seven subjects (3.4%) reported that they had received or were receiving antiretroviral therapy.

The demographics of subjects from syringe-exchange programs and from prisons were similar in terms of age and gender ( $p > 0.1$ ). 92% of the subjects from the syringe-exchange program recorded duration of IVDU but these data were not available in prison subjects due to technical errors. Other risk behavior data (e.g. MSMs and heterosexual contacts) were not available. It was not feasible to recruit HIV-negative or HIV and HCV negative subjects from prisons. There is a high rate of HIV infection as well as HIV/HCV coinfection rate in the subjects from prison. Prisoners indicated their previous drug use in questionnaires as according to official sources there is no drug use inside the prisons.

A control group of anonymous 500 subjects seronegative for HIV-1, HCV and HBV were recruited in 2010 from Caucasian blood donors in the same geographic area from which the IDU study participants were derived. Specially trained nurses informed all IDU participants who then voluntarily signed the consent form. All blood donors signed a form of agreement to use their leftover blood samples for research purposes. The written consent of these healthy donors is not required since no subject characteristics were collected and there is no possibility to identify them. Ethics Committees of Tallinn, University of Tartu and University of Texas Health Science Center at San Antonio approved these studies.

### Laboratory Analyses and Genotyping

HIV, HCV and HBV serostatus was determined at the Estonian HIV Reference Laboratory. HCV and HBV antibodies were assessed by ETI-AB-HCVK-3 anti-HCV test (DiaSorin, Vercelli, Italy), ETI-MAK-4 HBsAg (DiaSorin, Vercelli, Italy), and ETIAB-COREK Plus (anti-HBc core) (DiaSorin, Vercelli, Italy) assays. HIV testing was performed by using a fourth generation enzyme-linked immunoassay (Vironistica HIV Uniform II Ag/Ab, BioMerieux, Marcy Etoile, France) and confirmed by immunoblotting (INNO LIA HIV I/II Score Westernblot (Microgen Bioproducts Ltd, Surrey, UK). Persons were considered HBV positive if they had seropositivity for Core antibody (anti-HBcAb) or surface antigen (anti-HBsAg). The nationwide immunization program against HBV was initiated in 1999 to adolescence aged 12–13 years but the vaccination rates in 1999–2000 did not exceed 40%. More than 80% of our studied IDUs were older than that age at that time. Therefore, the rate of HBV vaccination in our studied IDUs was estimated to be very low thus unlikely influenced the study results.

Human genomic DNA was extracted from whole blood using the Qiagen QIAamp DNA minikit (Qiagen, Hilden, Germany). Polymorphisms in the promoter regions of *CCR5* (A29G, G208T, G303A, C630T, T627C, A676G, C927T), the coding regions of *CCR5* (*CCR5  $\Delta 32$* ) and *CCR2-V64I* (G190A) were determined by Taqman Allelic Discrimination assay (AppliedBiosystems, California, US) or PCR-RFLP assays as described previously [9,27]. **Figure 1** shows the prevailing numbering systems used for *CCR5* polymorphisms and the evolutionary-based classification of *CCR5* haplotypes (HHA to HHG\*2) as described previously [28]. The copy number of *CCL3L1* was available from a previous study [7].

### Statistical Analyses

The outcomes were HCV and HIV serostatus, and the explanatory variables were *CCR5* haplotypes or genotypes. Differences in the distribution of *CCR5* haplotypes between study groups were compared by Chi-square or Fisher exact tests. Uni- and multivariate logistic regression models were used to determine the associations between genotype and HCV and/or HIV before and after adjustment to co-variables. The co-variables were age, gender, HBV infection, length of IVDU (in years), *CCL3L1* copy number, and where appropriate concomitant HCV or HIV infection status.

## Results

### Study Population

**Table 1** shows the distribution of HIV, HCV and HBV serostatus among 373 IDUs. Of these, 14% ( $n = 53$ ) were seronegative for HIV, HCV and HBV, whereas 27% ( $n = 99$ ) and 7% ( $n = 27$ ) were seropositive for only HCV and HIV, respectively. 35% ( $n = 130$ ) were dually infected with HIV and HCV, and 12% ( $n = 44$ ) were seropositive for HIV, HCV and HBV. The proportion of subjects with HBV and HIV ( $n = 4$ , 1%) or mono-infection with HBV ( $n = 1$ ) was low.

**Table 2** shows the univariate associations for risk of HCV and HIV in the study participants. The likelihood (odds) of HCV seropositivity was 3.04 fold (95% confidence interval (CI) = 1.85–5.01) or 3.63-fold (95% CI = 1.40–9.42) respectively higher in those who were HIV or HBV seropositive (**Table 2**). Each additional year of IVDU increased the risk of HCV seropositivity by 1.23 fold (95% CI = 1.12–1.35). Similarly, subjects with HCV or HBV seropositivity were 3.04- and 5.16-fold, respectively, more likely to be HIV seropositive and each additional year of IVDU increased the risk of HIV seropositivity by 1.08 fold. The *CCL3L1*

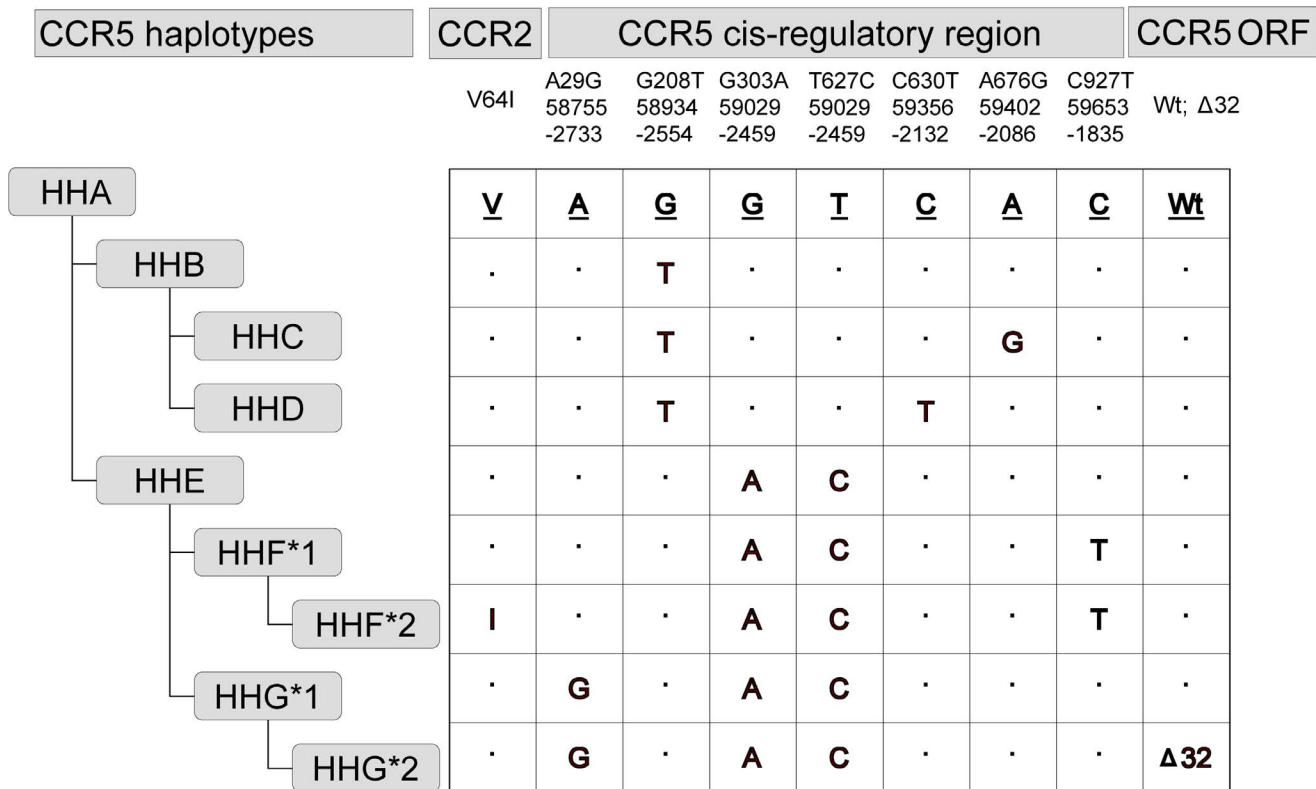

**Figure 1. CCR5 polymorphisms and haplotypes.** On the basis of the linkage disequilibrium patterns between the polymorphisms in the coding (Δ32) and noncoding (promoter) region of CCR5 and the coding polymorphism (V64I) in CCR2, we previously used an evolutionary-based strategy to generate the CCR5 human haplogroups (HH) shown below the CCR5 gene structure. These CCR5 HH are designated as HHA to HHG\*2, with HHF\*2 and HHG\*2 denoting the haplotypes that bear the CCR2–64I and CCR5–Δ32 polymorphisms, respectively. Because of its similarity to the chimpanzee CCR5 sequence, the human CCR5 HHA haplotype is classified as the ancestral CCR5 haplotype [28]. Nucleotide variations relative to the ancestral sequence are shown. The CCR5 numbering systems used in the literature are shown. Top numbering is based on GenBank accession numbers AF031236 and AF031237; middle numbering is based on GenBank accession number U95626; bottom numbering is the numbering system in which the first nucleotide of the CCR5 translational start site is designated as +1 and the nucleotide immediately upstream as -1 [28]. ORF, open-reading frame; Wt, wild-type; Δ32, 32-basepair deletion.  
doi:10.1371/journal.pone.0070561.g001

copy number was considered as a co-variate in the subsequent multivariate analyses, and its associations with HIV and HCV seropositivity were consistent with those reported previously [7]. Age and gender did not associate with either HCV or HIV serostatus.

**The Distribution of CCR5 Haplotypes and Haplotype Pairs**

Complete CCR5 genotype data was available from two study populations - 369 IDUs and 500 seronegative blood donors. All SNPs were in Hardy-Weinberg equilibrium in both study groups. The most frequent CCR5 haplotypes in both study groups were HHE and HHC; approximately half of the IDUs and blood donors possessed these haplotypes (Figure 2A). Consistent with their African-specific distribution [8,28], CCR5-HHB and -HHD haplotypes were not found in this Caucasian population (Figure 2A).

**Associations of CCR5 Haplotypes with HCV Serostatus**

To investigate whether CCR5 haplotypes are associated with HCV seropositivity, we compared the prevalence of CCR5 haplotypes between HCV seropositive (HCV+) and HCV seronegative (HCV-) IDUs, before and after accounting for concomitant HIV serostatus. The CCR5 HHG\*1 haplotype was over-represented in HCV- compared with HCV+ subjects (20.7% vs. 7.5%, respectively; p<0.001) (Figure 2B). In a multivariate logistic regression model that included all CCR5 haplotypes (HHA to HHG\*2), only the HHG\*1 haplotype associated significantly with HCV seropositivity (OR = 0.37; 95% CI = 0.17–0.84; P = 0.017). We then determined the association of HHG\*1 with HCV serostatus after controlling for HIV and HBV serostatus, as

**Table 1. HIV, HCV and HBV serostatus among 373 IDUs from Estonia in 2006–2007\*.**

| HIV | HCV | HBV | n (%)     |
|-----|-----|-----|-----------|
| +   | +   | +   | 44 (12%)  |
| +   | +   | -   | 130 (35%) |
| +   | -   | +   | 4 (1%)    |
| -   | +   | +   | 8 (2%)    |
| +   | -   | -   | 27 (7%)   |
| -   | +   | -   | 99 (27%)  |
| -   | -   | +   | 1 (0%)    |
| -   | -   | -   | 53 (14%)  |

\*HBV serostatus was unknown for 7 individuals.  
doi:10.1371/journal.pone.0070561.t001

**Table 2.** Factors influencing HCV and HIV serostatus by univariate analyses.

| Variable     | Comparison                 | Outcome: HCV serostatus                | Outcome: HIV serostatus                 |
|--------------|----------------------------|----------------------------------------|-----------------------------------------|
|              |                            | OR; 95% CI; P                          | OR; 95% CI; P                           |
| Gender       | Female vs Male             | 0.63; 0.34–1.17; 0.142                 | 1.16; 0.66–2.05; 0.609                  |
| Age (years)  | Years <sup>#</sup>         | 1.05; 0.99–1.11; 0.105                 | 1.02; 0.98–1.07; 0.357                  |
| HCV status   | HCV+vs HCV–                | n/a                                    | 3.04; 1.85–5.01; $1.70 \times 10^{-5}$  |
| HIV status   | HIV+vs HIV–                | 3.04; 1.85–5.01; $1.70 \times 10^{-5}$ | n/a                                     |
| HBV status   | HBV+vs HBV–                | 3.63; 1.40–9.42; 0.008                 | 5.16; 2.45–10.89; $2.19 \times 10^{-5}$ |
| IVDU (years) | years <sup>*</sup>         | 1.23; 1.12–1.35; $7.51 \times 10^{-5}$ | 1.08; 1.02–1.16; 0.015                  |
| CCL3L1 copy  | >2 vs 0–2 <sup>&amp;</sup> | 1.16; 0.63–2.13; 0.646                 | 0.48; 0.29–0.81; 0.005                  |

<sup>#</sup>The OR was estimated by every increased year of age;  
<sup>\*</sup>The OR was estimated by every increased year of IVDU use;  
<sup>&</sup>The median of CCL3L1 copy number is 2 copies in our studied IDUs.  
doi:10.1371/journal.pone.0070561.t002

well as duration of IVDU. In this multivariate model, possession of the *CCR5-HHG\*1* haplotype associated with 93% lower risk of HCV seropositivity compared with those lacking this haplotype (OR = 0.07, 95% CI = 0.03–0.20, P < 0.0001).

**Associations of CCR5 Haplotypes with HIV Serostatus**

When using HIV as an outcome, we observed that HHHF\*2 was over-presented in HIV-negative (HIV-) IDUs compared with HIV-positive (HIV+) IDUs (Figure 2C). The likelihood of bearing an HHHF\*2 haplotype was 43% lower in HIV- compared with HIV+ IDUs (OR = 0.57, 95% CI = 0.34–0.98, P = 0.041).

These data were in agreement with the published literature suggesting that the HHHF\*2 associates with a lower risk of acquiring HIV infection [8,29]. However, in multivariate logistic regression models after controlling for co-variables (HCV and HBV serostatus, length of IVDU and CCL3L1 copy number) or the other CCR5 haplotypes, the association of HHHF\*2 with a lower risk of HIV seropositivity was not evident (OR = 0.65; 95% CI = 0.34–1.24; P = 0.19). All other haplotypes were equally represented among HIV+ and HIV- IDUs.

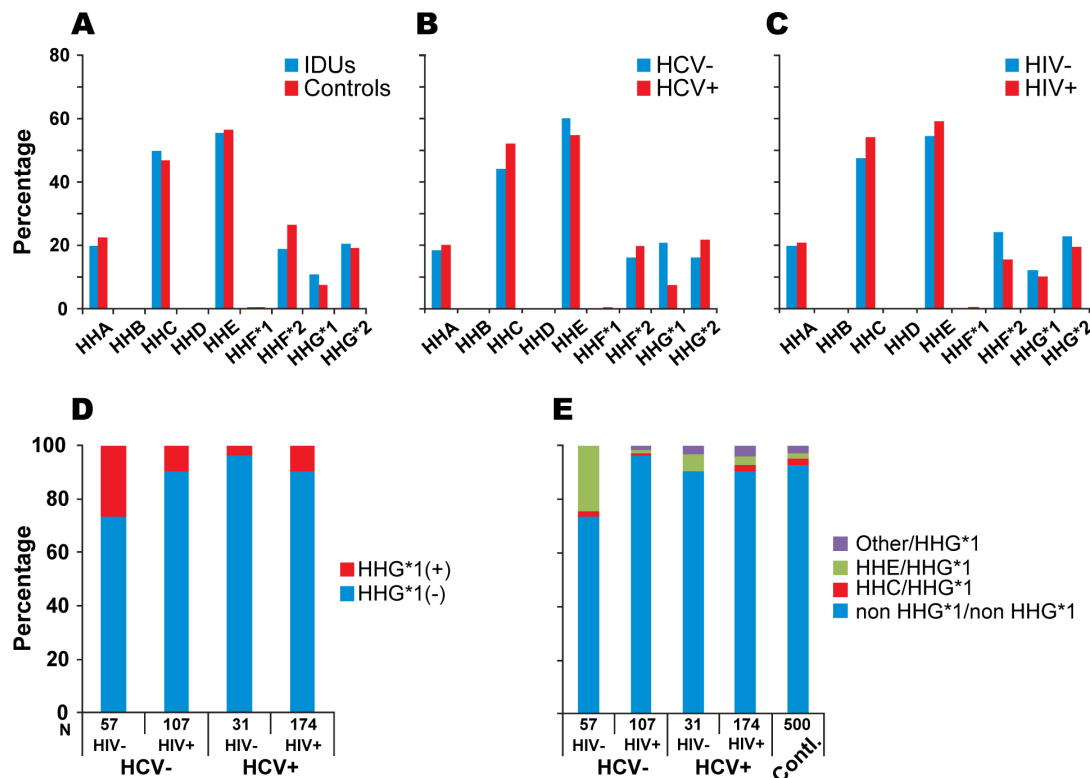

**Figure 2.** The distribution of CCR5 haplotypes among IDUs and blood donors. CCR5 haplotype frequency among (A) IDUs vs. blood donors, (B) HCV+vs. HCV- IDUs, and (C) HIV- vs. HIV+ IDUs. HHB and HDD are absent in the study populations. Frequency of (D) CCR5 HHG\*1 haplotype and (E) CCR5 HHG\*1-containing genotypes in IDUs by HCV and HIV serostatus.  
doi:10.1371/journal.pone.0070561.g002

### Associations of *CCR5*-*HHG\*1* with HCV after Accounting for HIV Co-infection

Although we found that *HHG\*1* associated with a lower rate of HCV seropositivity after accounting for multiple comparisons and non-genetic co-variables, a potential confounder was that a significant proportion of the HCV+ individuals were co-infected with HIV (35%), and conversely, 8% of HCV- subjects were HIV-positive (**Table 1**). To account for this potential confounder, we defined the associations of *HHG\*1* according to HCV and HIV serostatus. *HHG\*1* haplotype was significantly overrepresented in subjects who were both HIV and HCV seronegative compared with subjects who were HCV+only, HIV+only or were HCV+and HIV+ (**Figure 2D**). After controlling for co-variables, compared with individuals who were HCV-/HIV- (reference category), the likelihood of possessing a *HHG\*1*-containing genotype was lower by 92% (OR = 0.08; 95% CI = 0.02–0.29) and 82% (OR = 0.18; 95% CI = 0.06–0.54) in participants who were HCV+/HIV-, and HCV+/HIV+, respectively; the association in participants who were HCV-/HIV+ was not significant (OR = 0.43; 95% CI = 0.10–1.76) (**Table 3**, models 1 to 3).

We next determined which specific *HHG\*1*-containing genotype contributed to the reduced seropositivity of HCV. Among the study participants, the two most common *HHG\*1*-containing genotypes were HHE/*HHG\*1* and HHC/*HHG\*1*, present in 61% and 16% of the IDUs, respectively. Of these two *HHG\*1*-containing genotypes, HHE/*HHG\*1* was overrepresented in subjects who were seronegative for both HIV and HCV compared with subjects who were seropositive for HCV and/or HIV (**Figure 2E**). After controlling for co-variables, compared with IDUs who were seronegative for both HIV and HCV, the likelihood of possessing HHE/*HHG\*1* was lower by 98% and 93% in subjects who were HCV+/HIV- and HCV+/HIV+, respectively; the associations in participants who were HCV-/HIV+ was not statistically significant (**Table 3**, models 4 to 6).

On the basis of these findings, we hypothesized that if *HHG\*1*-containing genotypes associated with strong resistance to acquiring HCV or HCV/HIV in IDUs then the prevalence of *HHG\*1* or HHE/*HHG\*1* among HCV-/HIV- IDUs should be greatly overrepresented when compared with HCV-/HIV- blood donors. Consistent with this possibility, ~25% vs. <10% of the HCV-/HIV- IDUs vs. HCV-/HIV- blood donors, respectively, possessed the *HHG\*1* haplotype ( $p = 3.3 \times 10^{-6}$ ) or HHE/*HHG\*1* haplotype ( $p = 7.2 \times 10^{-15}$ ; **Figure 2E**).

### Associations of *CCR5*-*HHG\*1* with HCV Serostatus and Potential Confounding Factors

The aforementioned findings suggested *CCR5* *HHG\*1* haplotype influences HCV serostatus in our studied IDUs. To control for additional confounding factors, we did the following two analyses: First, we conducted a step-wise logistic regression analyses for the association between *HHG\*1* and HCV serostatus with the following covariates: HIV, and HIV and HBV serostatus, *CCL3L1* copy number, study population (i.e. prisons or syringe-exchange programs), duration of IVDU, age, gender and an interaction term “age×IVDU” (**Table 4**). The interaction term was included because a more pronounced effect of duration of IVDU on HCV seropositivity was found in the younger group (<26 years old, OR = 1.46,  $p = 7.51 \times 10^{-5}$ ) compared to the older group (≥26 years old, OR = 1.19,  $P = 0.016$ ). Second, we did the same analysis but restricted to the subjects from syringe-exchange program only, restricted to the younger group, and restricted to the older group (data not shown). Our results in each of these analysis indicated that the protective effect of *HHG\*1* on HCV serostatus persisted after controlling for potential confounding factors.

### Discussion

We evaluated a group of IDUs from the Estonia in whom nearly 80% of subjects were infected with HCV and/or HIV. The HIV epidemic in the Estonia is unique in that it is a relatively new epidemic with HIV infection rates peaking in 2001–2002 and is localized mainly among IDUs [7,30] (**Figure 3**). The HIV epidemic was antedated by an increase in infection rates of HBV and HCV by a few years (**Figure 3**). The principal finding of this study is that the *CCR5*-*HHG\*1* haplotype associates with strong resistance to HCV infection in a group of IDUs from Estonia at high risk for HCV and HIV infection. The *CCR5*-*HHG\*1* haplotype was highly overrepresented among the IDUs that were seronegative for both HCV and HIV comprising nearly 25% of these subjects. In contrast, less than 10% of IDUs who were seropositive for HCV and/or HIV as well as HCV-/HIV- blood donors possessed the *HHG\*1* haplotype.

A stratified analyses revealed that compared with individuals who resisted acquiring both HCV and HIV (i.e., HCV-/HIV-), subjects who were HCV+/HIV-, HCV-/HIV+, HCV+/HIV+ were ~90%, 57% and 80% less likely to possess the *CCR5*-*HHG\*1* haplotype, albeit the associations for participants who were HCV-/HIV+ did not achieve statistical significance at

**Table 3.** Association of *CCR5* *HHG\*1* with HCV or HIV serostatus.

| Model                                   | Study groups          | Unadjusted                             | Adjusted <sup>#</sup>                  |
|-----------------------------------------|-----------------------|----------------------------------------|----------------------------------------|
|                                         |                       | OR; 95% CI; P                          | OR; 95% CI; P                          |
| <b>HHG*1 vs non-HHG*1</b>               |                       |                                        |                                        |
| 1                                       | HCV+HIV- vs. HCV-HIV- | 0.11; 0.03–0.35; $2.0 \times 10^{-5}$  | 0.08; 0.02–0.29; $1.89 \times 10^{-4}$ |
| 2                                       | HCV-HIV+ vs. HCV-HIV- | 0.29; 0.08–1.12; 0.077                 | 0.43; 0.10–1.76; 0.242                 |
| 3                                       | HCV+HIV+ vs. HCV-HIV- | 0.29; 0.13–0.64; 0.002                 | 0.18; 0.06–0.54; 0.003                 |
| <b>HHE/HHG*1 vs non-HHG*1/non-HHG*1</b> |                       |                                        |                                        |
| 4                                       | HCV+HIV- vs. HCV-HIV- | 0.03; 0.00–0.23; 0.001                 | 0.02; 0.00–0.20; 0.001                 |
| 5                                       | HCV-HIV+ vs. HCV-HIV- | 0.21; 0.04–1.01; 0.055                 | 0.30; 0.06–1.58; 0.161                 |
| 6                                       | HCV+HIV+ vs. HCV-HIV- | 0.11; 0.04–0.30; $2.76 \times 10^{-5}$ | 0.07; 0.01–0.32; 0.001                 |

<sup>#</sup>Co-variables: HBV serostatus, *CCL3L1* copy number, IVDU duration and HBV serostatus.  
doi:10.1371/journal.pone.0070561.t003

**Table 4.** Association of *CCR5* HHG\*1 with HCV serostatus in univariate and stepwise multivariate logistic regression model.

| Models                                                                                                                       | n   | OR   | 95% CI     | P-value               |
|------------------------------------------------------------------------------------------------------------------------------|-----|------|------------|-----------------------|
| <b>Univariate model</b>                                                                                                      |     |      |            |                       |
| HHG(+) vs HHG(-)                                                                                                             | 368 | 0.31 | 0.16–0.61  | $8.79 \times 10^{-4}$ |
| <b>Multivariate models</b>                                                                                                   |     |      |            |                       |
| Adjusted for HIV serostatus                                                                                                  |     |      |            |                       |
| HHG(+) vs HHG(-)                                                                                                             | 368 | 0.30 | 0.15–0.63  | $1.35 \times 10^{-3}$ |
| Adjusted for HIV and HBV serostatus,                                                                                         |     |      |            |                       |
| HHG(+) vs HHG(-)                                                                                                             | 362 | 0.29 | 0.14–0.61  | $1.17 \times 10^{-3}$ |
| Adjusted for HIV, HBV serostatus and <i>CCL3L1</i> copy number*                                                              |     |      |            |                       |
| HHG(+) vs HHG(-)                                                                                                             | 362 | 0.30 | 0.14–0.64  | 0.001                 |
| Adjusted for HIV, HBV serostatus, <i>CCL3L1</i> copy number*, and study population <sup>#</sup>                              |     |      |            |                       |
| HHG(+) vs HHG(-)                                                                                                             | 343 | 0.21 | 0.10–0.45  | $8.32 \times 10^{-5}$ |
| Adjusted for HIV, HBV serostatus, <i>CCL3L1</i> copy number*, and duration of IVDU <sup>&amp;</sup>                          |     |      |            |                       |
| HHG(+) vs HHG(-)                                                                                                             | 228 | 0.08 | 0.03–0.421 | $9.47 \times 10^{-7}$ |
| Adjusted for HIV, HBV serostatus, <i>CCL3L1</i> copy number*, duration of IVDU <sup>&amp;</sup> , age and gender             |     |      |            |                       |
| HHG(+) vs HHG(-)                                                                                                             | 227 | 0.07 | 0.03–0.19  | $5.77 \times 10^{-7}$ |
| Adjusted for HIV, HBV serostatus, <i>CCL3L1</i> copy number*, duration of IVDU <sup>&amp;</sup> , age, gender and IVDU × age |     |      |            |                       |
| HHG(+) vs HHG(-)                                                                                                             | 227 | 0.06 | 0.02–0.17  | $2.07 \times 10^{-7}$ |

\*Dichotomized by the median of 2 *CCL3L1* copies;

<sup>#</sup>Syringe exchange program or Prisoners;

<sup>&</sup>Each additional year of IVDU use.

doi:10.1371/journal.pone.0070561.t004

$P < 0.05$ . One interpretation of these findings is that the HHG\*1 haplotype mainly influences risk of HCV. This possibility is reinforced by the finding that we and others did not find a substantial difference in the prevalence of the HHG\*1 haplotype when comparing HIV+vs. HIV- individuals [9,12]. However, the subjects who were HCV-/HIV+ were also the least represented group in the IDU study population, and consequently, a smaller sample size could have also accounted for the reduced strength of the association. Notwithstanding these caveats, these findings implicate a role for *CCR5* in risk of HCV and possibly, co-infection with HIV.

The *CCR5*-HHG\*1 haplotype has several noteworthy features that provides insights into a possible basis for the observed associations. Foremost, HHG\*1 is the ancestral haplotype upon which the HIV-resisting *CCR5*- $\Delta 32$ -containing HHG\*2 haplotype arose [8,28] (**Figure 1**). Thus, the *CCR5*-HHG\*1 haplotype has the same genetic features as the *CCR5*- $\Delta 32$ -containing HHG\*2 haplotype except that it lacks the  $\Delta 32$  mutation. However, HHG\*1 differs from HHG\*2 in two notable ways. First, HHG\*2 is restricted mainly to European populations. In contrast, HHG\*1 has a less restricted distribution and is prevalent in both European and non-European populations [8,9,12]. Second, heterozygosity

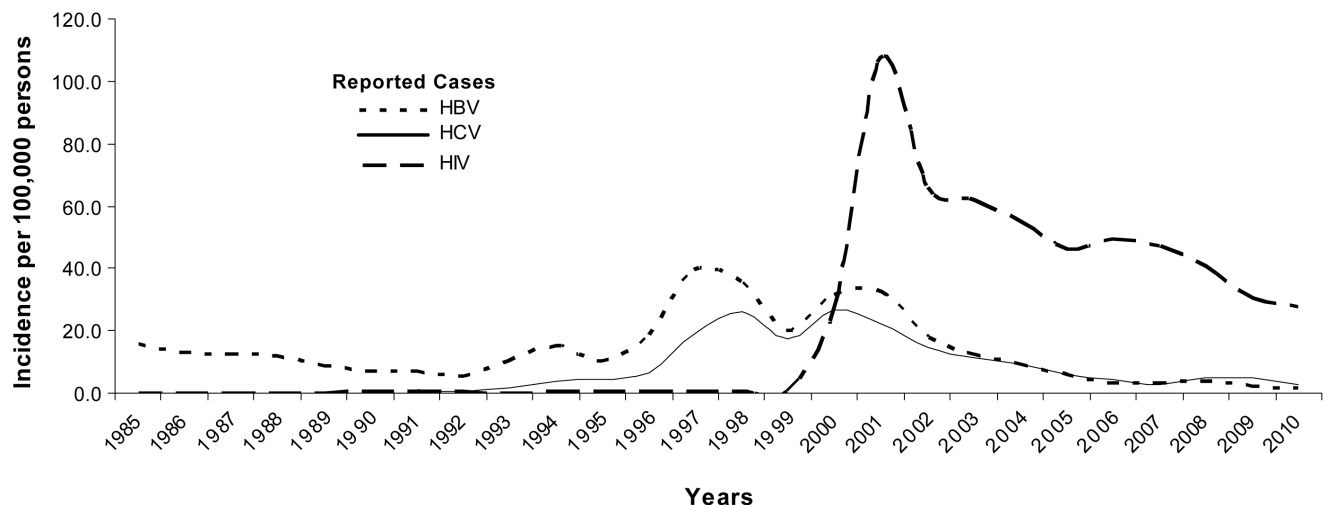

**Figure 3. Prevalence of HIV, HBV and HCV infection in Estonia.** Incidence per 100,000 population of HIV (dashed line), HBV (dotted line) and HCV (solid line) infection in Estonia between 1985–2010, as reported by the Estonian Health Board.

doi:10.1371/journal.pone.0070561.g003

and homozygosity of the *CCR5*- $\Delta 32$ -containing HHG\*2 haplotype associate with partial vs. complete reductions in CCR5 expression levels, respectively, and these expression patterns in turn contribute to their protective effects in HIV infection [31,32]. However, in contrast, the influence of HHG\*1 with CCR5 expression are unknown.

Although one possibility is that akin to the *CCR5*- $\Delta 32$ -containing HHG\*2 haplotype, the associations of the HHG\*1 haplotype with reduced HCV and/or HIV risk are related to CCR5 expression. However, another possibility is that the effects are indirect, i.e., related to another gene. We raise this point as the polymorphism in the non-coding region of *CCR5* that is shared by HHG\*1 and HHG\*2 and which distinguishes it from all the other *CCR5* haplotypes (named as A29G in Figure 1) is in nearly 100% linkage disequilibrium with a polymorphism in a haplotype of *CCRL2* (www.hapmap.org and data not shown) that is ~31 kb downstream of *CCR5*. Recent studies have demonstrated that this *CCRL2* haplotype associates with multiple diseases [33,34].

CCR5 is not being expressed on hepatocytes and is not a receptor for HCV entry. It is hypothesized that CCR5 interacts with its ligands to promote the recruitment of Th1 expressing cells into the liver [35,36]. HCV core protein alters *CCL5* promoter activity [37] resulting in higher levels of CCL5. Increased binding of CCL5 to CCR5 decreases CCR5 surface density due to receptor internalization [38]. These findings together with our results suggest that the chemokine receptor-ligand CCR5-CCL5 system may contribute to acquisition of HCV infection.

Most of the prior studies related to the associations between *CCR5* gene variants and HCV risk have been largely restricted to the *CCR5*- $\Delta 32$  mutation. Woitas *et al.* proposed that *CCR5*- $\Delta 32$  homozygosity (HHG\*2/HHG\*2) was a susceptibility factor for HCV infection [6]. However, others did not observe this association [17,23,39,40]. In our study population, the *CCR5*- $\Delta 32/\Delta 32$  was not enriched in monoinfected HCV-subjects. The increased frequency of the *CCR5*- $\Delta 32/\Delta 32$  genotype among HCV-infected-HIV-uninfected subjects observed by Woitas *et al.* could have been secondary to the protective effects of this genotype against acquiring HIV infection as their study population comprised mainly of hemophiliacs who were HIV negative [5,6]. Hence, hemophiliacs have a high risk of both HIV and HCV it is conceivable that the increased prevalence of *CCR5*- $\Delta 32/\Delta 32$  in their study population is due to their HIV-negative status, rather than the HCV-positive status of the monoinfected HCV study group.

As we did not study a seroincident study population, an argument could be made that the overrepresentation of HHG\*1 among the HCV-/HIV- IDUs is simply a reflection of an association of HHG\*1 with an accelerated HCV or HIV disease course, resulting in the underrepresentation of carriage of HHG\*1 among the surviving mono- or dual infected HCV or HIV infected individuals. However, the similarity in the frequency of subjects bearing the HHG\*1 haplotype in mono- or dual-infected IDU's and HIV-/HCV- blood donors (<10% in each) argues against this possibility. Furthermore, the latter observation and the fact that the study participants were all Caucasians from a restricted geographic region in Estonia mitigates against the possibility that the enrichment of HHG\*1 among HCV-/HIV- IDUs is due to selective population admixture in this group alone.

Our study has some limitations. First, the duration of IVDU was only known for two thirds of the population and that is mainly from the subjects from the syringe exchange program. However, bearing in mind the similarity of subjects from the two populations

in terms of demographic and risk behaviors as well as the short duration of the HIV epidemic in Estonia in general [41,42], we believe that the duration of IVDU in one population reflects the one in the other. Second, all subjects in the prison cohort were HIV positive and there were more HIV/HCV co-infection among them than in the syringe exchange programs. One of the main reasons is that HIV negative populations cannot be recruited from prisons. However, we emphasize that almost all HIV infected subjects in prisons were infected before they went to prisons. However, by conducting studies in IDUs over several years we have noticed that repeated imprisonment among IDUs is common but short sentences are given. Despite these limitations, we believe that both populations are in essence similar in terms of demographic risk behavior. Thus, the combined analyses of patients from two sources (prisoners plus those from syringe exchange program) do not preclude insights into the relationship of *CCR5* genetics with HIV/HCV serostatus.

In addition, our studied subjects are young with median age of 26 years old. We asked whether our findings are biased due to some individuals might not have enough time of IVDU to get infected of HCV. Although we found a more pronounced effect of duration of IVDU on HCV seropositivity in the younger group compared that in the older group, our multivariate analysis in the overall group as well as the stratified analysis in both the younger and older group suggests that confounding of our findings due to age is highly unlikely. Finally, as we have only data for the HCV serostatus (the presence of HCV antibody) but not for active infection (HCV RNA), we cannot evaluate the influence of *CCR5* haplotypes on the disease course or HCV clearance. Further studies needed to validate these findings due to the small size of subjects we studied.

In conclusion, we evaluated a large sample size of high-risk subjects and blood donors from a relatively homogenous Caucasian population. This large sample size facilitated categorization of IDU's into four categories according to their HIV and HCV serostatus, mitigating the potential confounding due to co-infection status. Our study design accounted for three other potential confounders: HBV serostatus, the previously demonstrated strong associations of the *CCL3L1* copy number with protection against HIV infection [7], and length of IVDU. The persistence of the association of *CCR5* HHG\*1-containing genotypes with reduced seropositivity of HCV after accounting for these potential confounders strongly suggests a strong role for this genotype, and by extension the *CCR5* locus in HCV infection and possibly HIV infection. Consistent with this possibility, others have shown a role of variations of CCR5 in antiviral responses and chronic HCV infection. However, as noted, given the very high linkage between HHG\*1 and a *CCRL2* haplotype that has been shown to influence other infectious and non-infectious diseases, one cannot exclude a possible role for *CCRL2* in HCV susceptibility.

## Acknowledgments

We thank the study participants and teams from the Tartu Prison, from non-governmental organizations "Convictus" and "Me aitame sind".

## Author Contributions

Conceived and designed the experiments: KH SKA WH IL. Performed the experiments: KH RA AC WH. Analyzed the data: KH NH SKA WH IL. Contributed reagents/materials/analysis tools: MP MS T. Karki T. Krispin UK TJ KR AT KA AU. Wrote the paper: KH NH SKA WH IL.

## References

- Walsh N, Maher L (2012) HIV and viral hepatitis C coinfection in people who inject drugs: implications of new direct acting antivirals for hepatitis C virus treatment. *Curr Opin HIV AIDS* 7: 339–344.
- Sherman KE, Rouster SD, Chung RT, Rajicic N (2002) Hepatitis C Virus prevalence among patients infected with Human Immunodeficiency Virus: a cross-sectional analysis of the US adult AIDS Clinical Trials Group. *Clin Infect Dis* 34: 831–837.
- Lacombe K, Rockstroh J (2012) HIV and viral hepatitis coinfections: advances and challenges. *Gut* 61 Suppl 1: i47–58.
- Grebely J, Tyndall MW (2011) Management of HCV and HIV infections among people who inject drugs. *Curr Opin HIV AIDS* 6: 501–507.
- Zhang M, Goedert JJ, O'Brien TR (2003) High frequency of CCR5-delta32 homozygosity in HCV-modifying effects HIV-1-uninfected hemophiliacs results from resistance to HIV-1. *Gastroenterology* 124: 867–868.
- Woitak RP, Ahlenstiel G, Iwan A, Rockstroh JK, Brackmann HH, et al. (2002) Frequency of the HIV-protective CC chemokine receptor 5-Delta32/Delta32 genotype is increased in hepatitis C. *Gastroenterology* 122: 1721–1728.
- Huik K, Sadam M, Karki T, Avi R, Krispin T, et al. (2010) CCL3L1 copy number is a strong genetic determinant of HIV seropositivity in Caucasian intravenous drug users. *J Infect Dis* 201: 730–739.
- Gonzalez E, Bamshad M, Sato N, Mummidi S, Dhanda R, et al. (1999) Race-specific HIV-1 disease-modifying effects associated with CCR5 haplotypes. *Proc Natl Acad Sci U S A* 96: 12004–12009.
- Gonzalez E, Dhanda R, Bamshad M, Mummidi S, Geevarghese R, et al. (2001) Global survey of genetic variation in CCR5, RANTES, and MIP-1alpha: impact on the epidemiology of the HIV-1 pandemic. *Proc Natl Acad Sci U S A* 98: 5199–5204.
- Salkowitz JR, Bruse SE, Meyerson H, Valdez H, Mosier DE, et al. (2003) CCR5 promoter polymorphism determines macrophage CCR5 density and magnitude of HIV-1 propagation in vitro. *Clinical immunology* 108: 234–240.
- Hladik F, Liu H, Speelman E, Livingston-Rosanoff D, Wilson S, et al. (2005) Combined effect of CCR5-Delta32 heterozygosity and the CCR5 promoter polymorphism -2459 A/G on CCR5 expression and resistance to human immunodeficiency virus type 1 transmission. *Journal of virology* 79: 11677–11684.
- Li M, Song R, Masciotra S, Soriano V, Spira TJ, et al. (2005) Association of CCR5 human haplogroup E with rapid HIV type 1 disease progression. *AIDS Res Hum Retroviruses* 21: 111–115.
- Mangano A, Gonzalez E, Dhanda R, Catano G, Bamshad M, et al. (2001) Concordance between the CC chemokine receptor 5 genetic determinants that alter risks of transmission and disease progression in children exposed perinatally to human immunodeficiency virus. *J Infect Dis* 183: 1574–1585.
- Smith MW, Dean M, Carrington M, Winkler C, Huttley GA, et al. (1997) Contrasting genetic influence of CCR2 and CCR5 variants on HIV-1 infection and disease progression. Hemophilia Growth and Development Study (HGDS), Multicenter AIDS Cohort Study (MACS), Multicenter Hemophilia Cohort Study (MHCS), San Francisco City Cohort (SFCC), ALIVE Study. *Science* 277: 959–965.
- Macias J, Vispo E, Pineda JA, Soriano V (2011) Host genetics. *Curr Opin HIV AIDS* 6: 491–500.
- Goulding C, McManus R, Murphy A, MacDonald G, Barrett S, et al. (2005) The CCR5-delta32 mutation: impact on disease outcome in individuals with hepatitis C infection from a single source. *Gut* 54: 1157–1161.
- Ruiz-Ferrer M, Barroso N, Antinolo G, Aguilar-Reina J (2004) Analysis of CCR5-Delta 32 and CCR2-V64H polymorphisms in a cohort of Spanish HCV patients using real-time polymerase chain reaction and fluorescence resonance energy transfer technologies. *J Viral Hepat* 11: 319–323.
- Katsounas A, Trippier M, Kottlil S, Lempicki RA, Gerken G, et al. (2012) Cytokine/chemokine patterns connect host and viral characteristics with clinics during chronic hepatitis C. *Eur J Med Res* 17: 9.
- Ksiaz Cheikh Rouhou L, Gorgi YL, Skhiri HA, Aouadi H, Ayed SJ, et al. (2011) Chemokine and chemokine receptor gene polymorphism in Tunisian hemodialysis patients with HCV infection. *Arab J Nephrol Transplant* 4: 117–124.
- Zeremski M, Hooker G, Shu MA, Winkelstein E, Brown Q, et al. (2011) Induction of CXCR3- and CCR5-associated chemokines during acute hepatitis C virus infection. *J Hepatol* 55: 545–553.
- Dorak MT, Folayan GO, Nivas S, van Leeuwen DJ, Yee LJ, et al. (2002) C-C chemokine receptor 2 and C-C chemokine receptor 5 genotypes in patients treated for chronic hepatitis C virus infection. *Immunol Res* 26: 167–175.
- Konishi I, Horiike N, Hiasa Y, Michitaka K, Onji M (2004) CCR5 promoter polymorphism influences the interferon response of patients with chronic hepatitis C in Japan. *Intervirol* 47: 114–120.
- Promrat K, McDermott DH, Gonzalez CM, Kleiner DE, Koziol DE, et al. (2003) Associations of chemokine system polymorphisms with clinical outcomes and treatment responses of chronic hepatitis C. *Gastroenterology* 124: 352–360.
- Apolinario A, Majano PL, Alvarez-Perez E, Saez A, Lozano C, et al. (2002) Increased expression of T cell chemokines and their receptors in chronic hepatitis C: relationship with the histological activity of liver disease. *Am J Gastroenterol* 97: 2861–2870.
- Broadhead RS, van Hulst Y, Heckathorn DD (1999) The impact of a needle exchange's closure. *Public Health Rep* 114: 439–447.
- Malekinejad M, Johnston LG, Kendall C, Kerr LR, Rifkin MR, et al. (2008) Using respondent-driven sampling methodology for HIV biological and behavioral surveillance in international settings: a systematic review. *AIDS Behav* 12: S105–130.
- Catano G, Chykarenko ZA, Mangano A, Anaya JM, He W, et al. (2011) Concordance of CCR5 genotypes that influence cell-mediated immunity and HIV-1 disease progression rates. *J Infect Dis* 203: 263–272.
- Mummidi S, Bamshad M, Ahuja SS, Gonzalez E, Feuillet PM, et al. (2000) Evolution of human and non-human primate CC chemokine receptor 5 gene and mRNA. Potential roles for haplotype and mRNA diversity, differential haplotype-specific transcriptional activity, and altered transcription factor binding to polymorphic nucleotides in the pathogenesis of HIV-1 and simian immunodeficiency virus. *J Biol Chem* 275: 18946–18961.
- Malhotra R, Hu L, Song W, Brill I, Mulenga J, et al. (2011) Association of chemokine receptor gene (CCR2-CCR5) haplotypes with acquisition and control of HIV-1 infection in Zambians. *Retrovirology* 8: 22.
- Abel-Ollo K, Rahu M, Rajaleid K, Talu A, Ruutel K, et al. (2009) Knowledge of HIV serostatus and risk behaviour among injecting drug users in Estonia. *AIDS Care* 21: 851–857.
- Paxton WA, Liu R, Kang S, Wu L, Gingeras TR, et al. (1998) Reduced HIV-1 infectability of CD4+lymphocytes from exposed-uninfected individuals: association with low expression of CCR5 and high production of beta-chemokines. *Virology* 244: 66–73.
- de Roda Husman AM, Blaak H, Brouwer M, Schuitemaker H (1999) CC chemokine receptor 5 cell-surface expression in relation to CC chemokine receptor 5 genotype and the clinical course of HIV-1 infection. *J Immunol* 163: 4597–4603.
- An P, Li R, Wang JM, Yoshimura T, Takahashi M, et al. (2011) Role of exonic variation in chemokine receptor genes on AIDS: CCR2 F167Y association with pneumocystis pneumonia. *PLoS Genet* 7: e1002328.
- Hyde CL, Macinnes A, Sanders FA, Thompson JF, Mazzarella RA, et al. (2010) Genetic association of the CCR5 region with lipid levels in at-risk cardiovascular patients. *Circ Cardiovasc Genet* 3: 162–168.
- Kusano F, Tanaka Y, Marumo F, Sato C (2000) Expression of C-C chemokines is associated with portal and periportal inflammation in the liver of patients with chronic hepatitis C. *Lab Invest* 80: 415–422.
- Shields PL, Morland CM, Salmon M, Qin S, Hubscher SG, et al. (1999) Chemokine and chemokine receptor interactions provide a mechanism for selective T cell recruitment to specific liver compartments within hepatitis C-infected liver. *J Immunol* 163: 6236–6243.
- Soo HM, Garzino-Demo A, Hong W, Tan YH, Tan YJ, et al. (2002) Expression of a full-length hepatitis C virus cDNA up-regulates the expression of CC chemokines MCP-1 and RANTES. *Virology* 303: 253–277.
- Solari R, Offord RE, Remy S, Aubry JP, Wells TN, et al. (1997) Receptor-mediated endocytosis of CC-chemokines. *J Biol Chem* 272: 9617–9620.
- Nguyen GT, Carrington M, Becler JA, Dean M, Aledort LM, et al. (1999) Phenotypic expressions of CCR5-delta32/delta32 homozygosity. *J Acquir Immune Defic Syndr* 22: 75–82.
- Thoelen I, Verbeeck J, Wollants E, Maes P, Robaey G, et al. (2005) Frequency of the CCR5-Delta32 mutant allele is not increased in Belgian hepatitis C virus-infected patients. *Viral Immunol* 18: 232–235.
- Zetterberg V, Ustina V, Liitsola K, Zilmer K, Kalikova N, et al. (2004) Two viral strains and a possible novel recombinant are responsible for the explosive injecting drug use-associated HIV type 1 epidemic in Estonia. *AIDS Res Hum Retroviruses* 20: 1148–1156.
- Adojaan M, Kivisild T, Mannik A, Krispin T, Ustina V, et al. (2005) Predominance of a rare type of HIV-1 in Estonia. *J Acquir Immune Defic Syndr* 39: 598–605.
